# Supplementary material for: The subcortical maternal complex protein Nlrp4f is involved in cytoplasmic lattice formation and organelle distribution
Source: Oxford University Press journal article supplement (doi:10.1242/dev.183616), 2019-01-01
Supplement: dev183616supp.pdf [file dev183616supp.pdf]

Figure S1

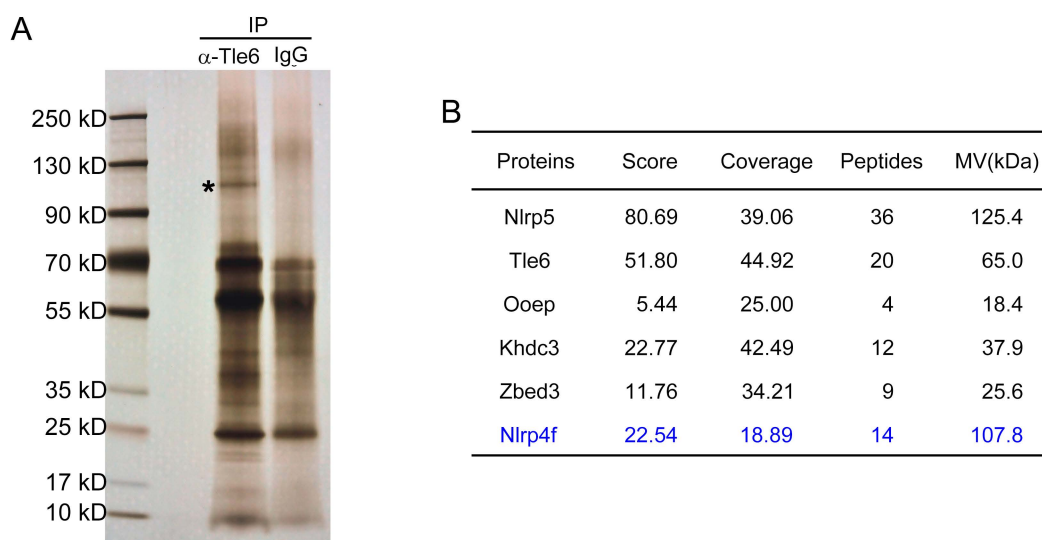

**Figure S1. Identification of Nlrp4f as a potential component of the SCMC by mass spectrometry (Modified from our previous report (Gao et al., 2018)).** (A) Normal GV oocytes were precipitated with anti-Tle6 antibody, and IgG (negative control). The precipitated products were separated by SDS-PAGE, examined by silver staining and analyzed by mass spectrometry. The asterisk indicated the possible band of Nlrp4f estimated by its molecular weight. (B) The information of mass spectrometry was shown for the known SCMC components and Nlrp4f.



Figure S3

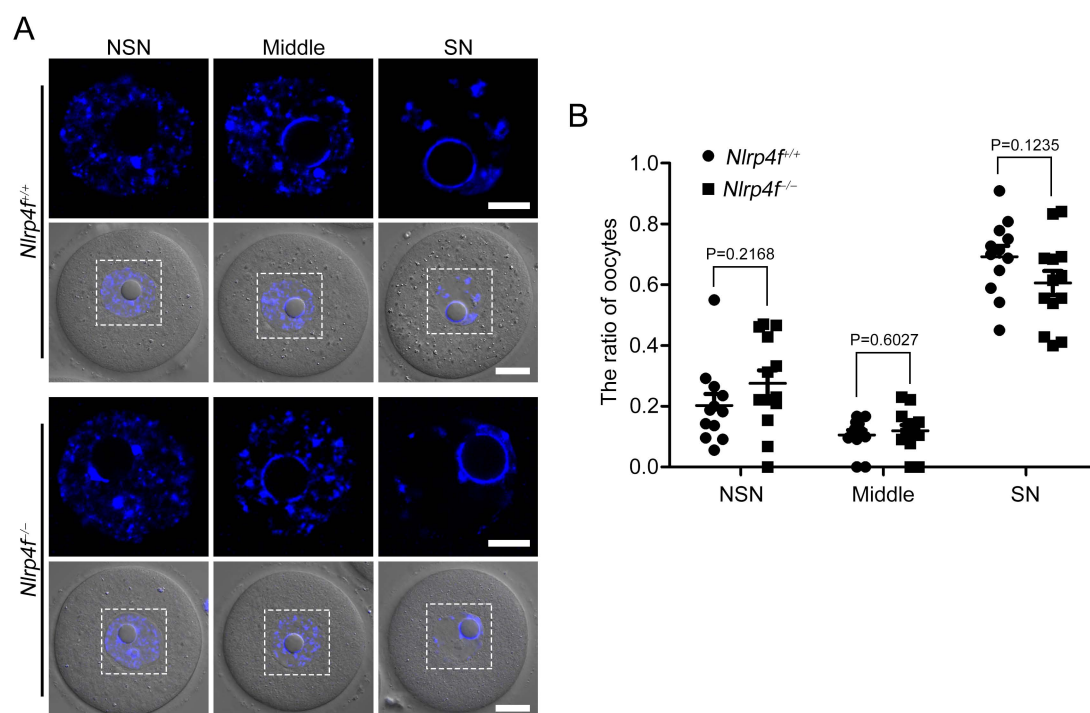

**Figure S3. Chromatin configurations in fully grown oocytes.** (A) Fully grown oocytes from *Nlrp4f*<sup>+/+</sup> and *Nlrp4f*<sup>-/-</sup> females were stained with Hoechst 33342 for DNA. According to their chromatin configuration of DNA, the oocytes were classified into three types, NSN, Middle and SN type. The nucleus was dotted with white color and magnified. Scale bar in the upper panel: 10  $\mu$ m. Scale bar in the down panel: 20  $\mu$ m. (B) GV oocytes from *Nlrp4f*<sup>+/+</sup> (n = 12) and *Nlrp4f*<sup>-/-</sup> (n = 13) female mice were classified into three groups, and the ratio was calculated by the number of NSN, Middle and SN dividing the number of total oocytes. Error bars, s.e.m.

Figure S4

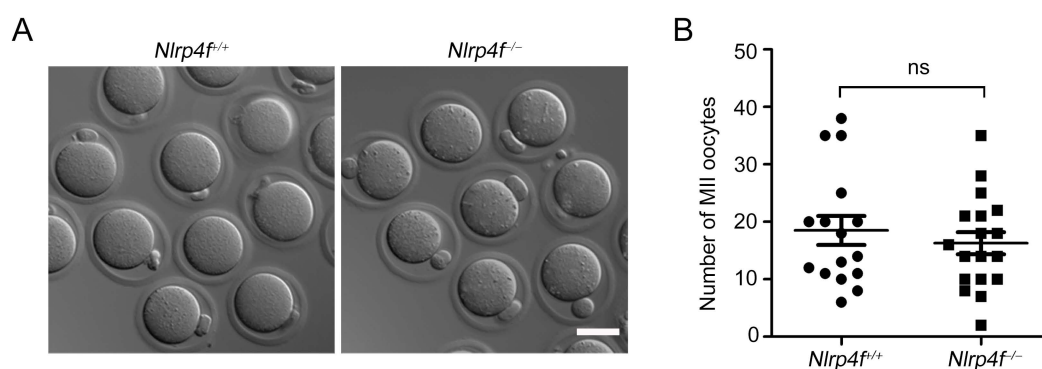

**Figure S4. Ovulation in *Nlrp4f* null mice.** (A) Representative images of bright field of *Nlrp4f*<sup>+/+</sup> and *Nlrp4f*<sup>-/-</sup> MII oocytes after superovulation. Scale bar: 50  $\mu$ m. (B) The number of MII oocytes from *Nlrp4f*<sup>+/+</sup> and *Nlrp4f*<sup>-/-</sup> mice after superovulation. Error bars, s.e.m. ns, no significant.

Figure S5

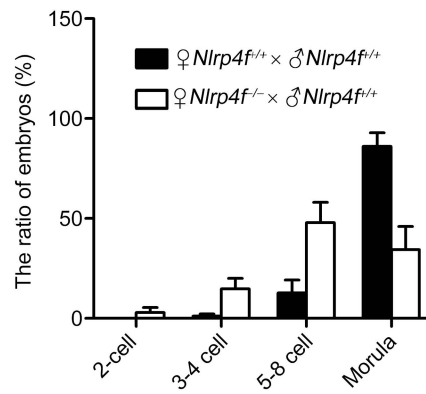

**Figure S5. Abnormal development in embryos with depletion of maternal *Nlrp4f*.** The ratio of embryos at different development stages from *Nlrp4f*<sup>+/+</sup> and *Nlrp4f*<sup>-/-</sup> females at E2.5.

Figure S6

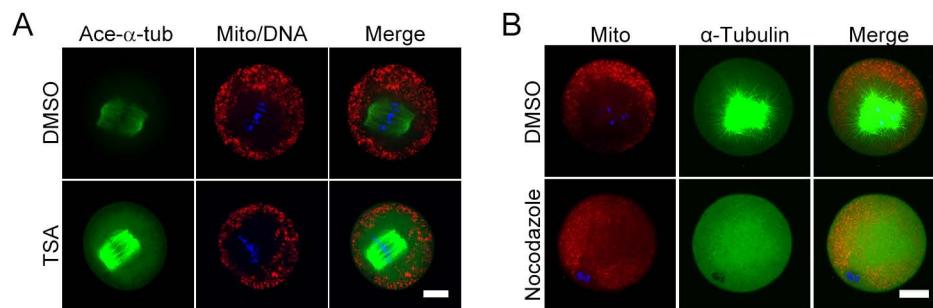

**Figure S6. Drug treatment of *Nlrp4f*<sup>-/-</sup> oocytes.** (A) *Nlrp4f*<sup>-/-</sup> oocytes were labeled with MitoTracker (red) after the treatment with DMSO or TSA at GVBD 1-2 h, then fixed and stained with anti-acetylated- $\alpha$ -tubulin antibody (Ace- $\alpha$ -tubulin, green) and Hoechst 33342 (DNA, blue). Scale bar: 20  $\mu$ m. (B) *Nlrp4f*<sup>-/-</sup> oocytes were labeled with MitoTracker (red) the treatment with DMSO or Nocodazole at GVBD 1-2 h, then fixed and stained with anti- $\alpha$ -tubulin antibody (green) and Hoechst33342 (DNA, blue). Scale bar: 20  $\mu$ m.

Figure S7

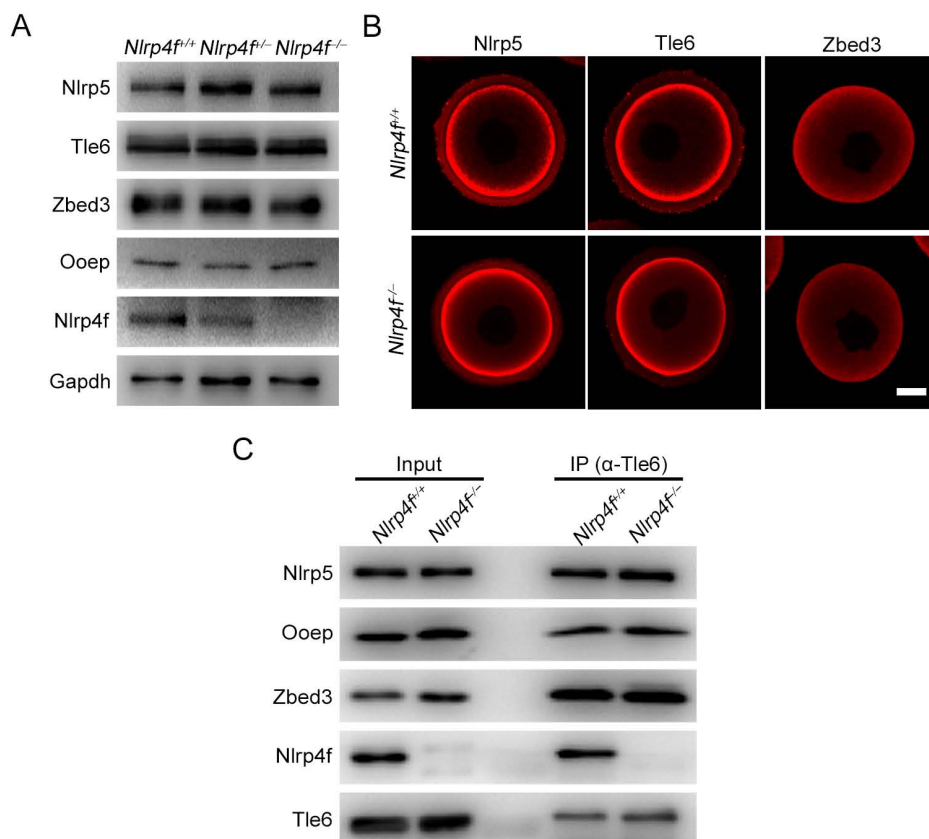

**Figure S7. The expression patterns of the known SCMC components in *Nlrp4f*<sup>-/-</sup> oocytes.** (A) Immunoblot of *Nlrp4f*<sup>+/+</sup>, *Nlrp4f*<sup>+/-</sup> and *Nlrp4f*<sup>-/-</sup> GV oocytes with anti-Nlrp5, -Tle6, -Zbed3, -Ooep and -Nlrp4f antibodies. Gapdh was used as a loading control. (B) Immunofluorescent staining of GV oocytes from *Nlrp4f*<sup>+/+</sup> and *Nlrp4f*<sup>-/-</sup> females with anti-Nlrp5, -Tle6 and -Zbed3 antibodies. Scale bar: 20 μm. (C) Co-immunoprecipitation of GV oocytes (200) from *Nlrp4f*<sup>+/+</sup> and *Nlrp4f*<sup>-/-</sup> females with anti-Tle6 antibody, followed by immunoblot with specific antibodies for the SCMC proteins.

Figure S8

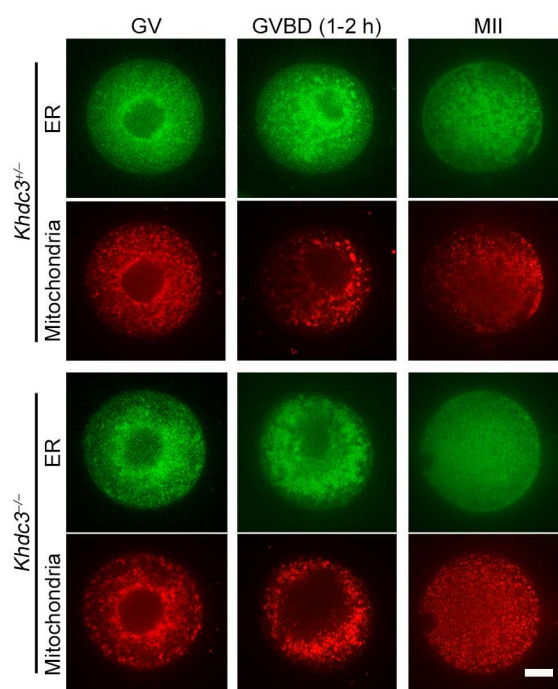

**Figure S8. Disordered organelle distribution in *Khdc3*<sup>-/-</sup> oocytes.** The oocytes were isolated from *Khdc3*<sup>+/+</sup> and *Khdc3*<sup>-/-</sup> females and were labeled with ER-Tracker (green) and MitoTracker (red) for ERs and mitochondria. *Khdc3*<sup>+/+</sup> (GV, n = 18; GVBD 1-2 h, n = 19; MII, n = 22) and *Khdc3*<sup>-/-</sup> (GV, n = 24; GVBD 1-2 h, n = 31; MII, n = 34) oocytes were investigated in three independent experiments. Scale bar: 20  $\mu$ m.



**Table 1 The list of antibodies**

| Primary antibodies                       |                |                        |                          |
|------------------------------------------|----------------|------------------------|--------------------------|
| Antibody                                 | For immunoblot | For immunofluorescence | Source                   |
| Mouse anti-Nlrp5                         | 1:1000         | 1:200                  |                          |
| Mouse anti-Tle6                          | 1:1000         | 1:200                  |                          |
| Rabbit anti-Ooep                         | 1:2000         | -                      |                          |
| Rabbit anti-Zbed3                        | 1:2000         | 1:200                  |                          |
| Sheep anti-Khdc3                         | 1:500          | -                      |                          |
| Rabbit anti-Nlrp4f                       | 1:2000         | 1:200                  | Produced by Abmart       |
| Mouse anti-Gapdh                         | 1:5000         | -                      | Sungene biotech, KM9002T |
| Mouse anti- $\beta$ -actin               | 1:5000         | -                      | Sungene biotech, KM9001T |
| Mouse anti-Acetylated- $\alpha$ -tubulin | 1:1000         | -                      | Abcam, ab24610           |
| Rabbit anti- $\alpha$ -tubulin           | 1:1000         | -                      | Cell signaling, 2144     |
| Mouse anti- $\alpha$ -tubulin-FITC       | -              | 1:200                  | Sigma, F2168             |

| Secondary antibodies                               |                |                        |                                      |
|----------------------------------------------------|----------------|------------------------|--------------------------------------|
| Antibody                                           | For immunoblot | For immunofluorescence | Source                               |
| Alexa Fluor® 488 AffiniPure Donkey Anti-Rabbit IgG | -              | 1:500                  | Jackson Immuno Research, 711-545-152 |
| Alexa Fluor® 594 AffiniPure Donkey Anti-Mouse IgG  | -              | 1:500                  | Jackson Immuno Research, 715-585-150 |
| Peroxidase AffiniPure Goat Anti-Rabbit IgG         | 1:5000         | -                      | Jackson Immuno Research, 111-035-003 |
| Peroxidase AffiniPure Goat Anti-Mouse IgG          | 1:5000         | -                      | Jackson Immuno Research, 115-035-003 |
| Peroxidase AffiniPure Donkey Anti-Sheep IgG        | 1:2000         | -                      | Jackson Immuno Research, 713-035-003 |

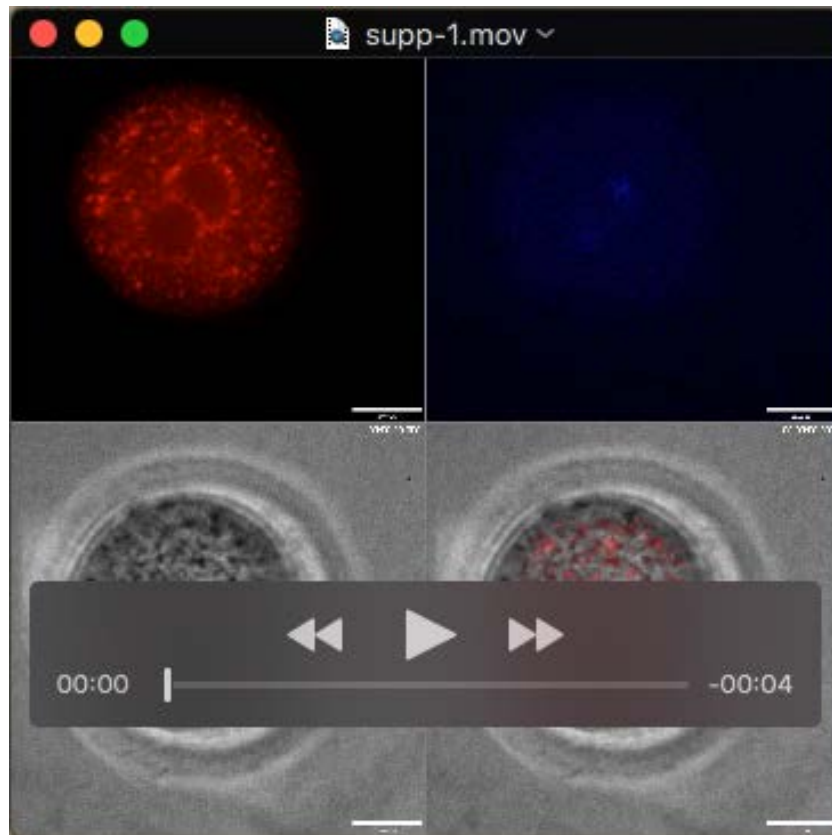

**Movie 1. Mitochondria dynamics in the embryos from *Nlrp4f*<sup>+/+</sup> females during 1-cell to 2-cell development.** Zygotes were isolated from *Nlrp4f*<sup>+/+</sup> females at 24 h after hCG stimulation, labeled with MitoTracker for mitochondria and Hoechst 33342 for DNA and cultured to 2-cell stage. Time-lapse images were captured every 30 mins with UltraVIEW-VoX. Related to Fig. 4B.

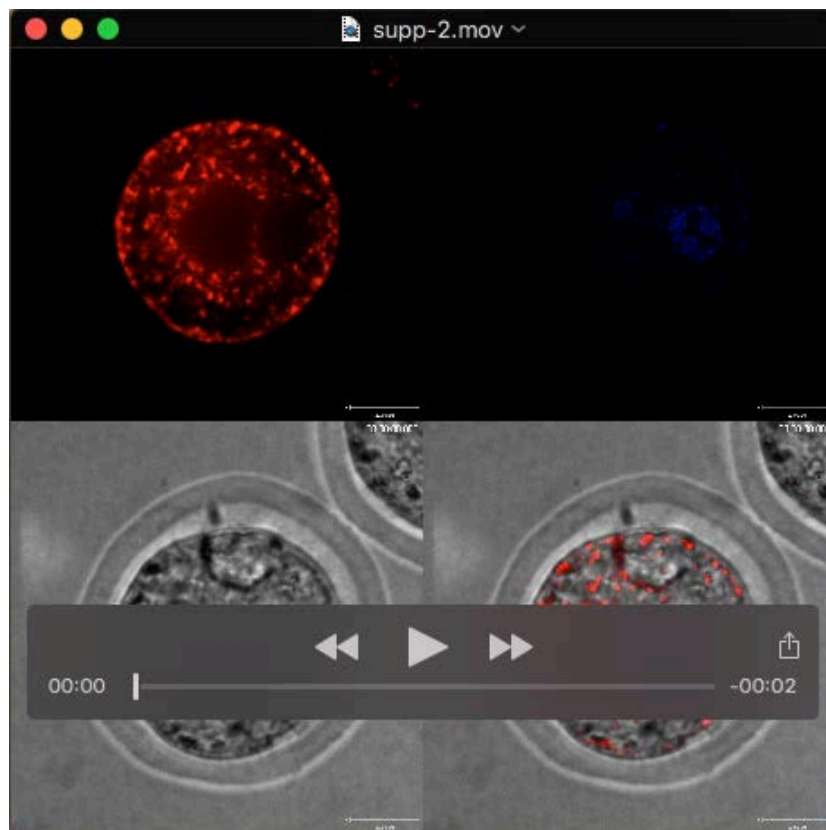

**Movie 2. Mitochondria dynamics in the embryos from *Nlrp4f*<sup>-/-</sup> females during 1-cell to 2-cell development.** Zygotes were isolated from *Nlrp4f*<sup>-/-</sup> females at 26 hrs after hCG stimulation, labeled with MitoTracker for mitochondria and Hoechst 33342 for DNA and cultured to 2-cell stage. Time-lapse images were captured every 30 mins with UltraVIEW-VoX. Related to Fig. 4B.

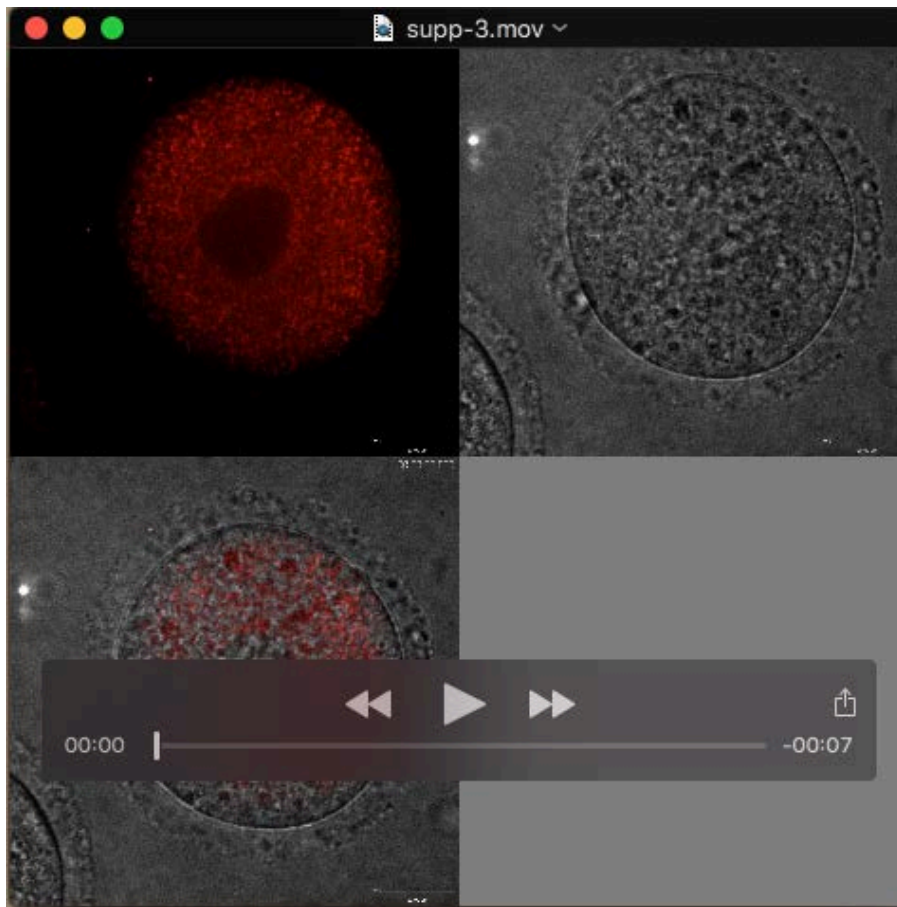

**Movie 3. Mitochondria dynamics in the oocytes from *Nlrp4f*<sup>+/+</sup> females during GV to MII maturation.** GV oocytes from *Nlrp4f*<sup>+/+</sup> females were labeled with MitoTracker for mitochondria and cultured to MII stage. Time-lapse images were captured every 30 mins with UltraVIEW-VoX. Related to Fig. 4D.

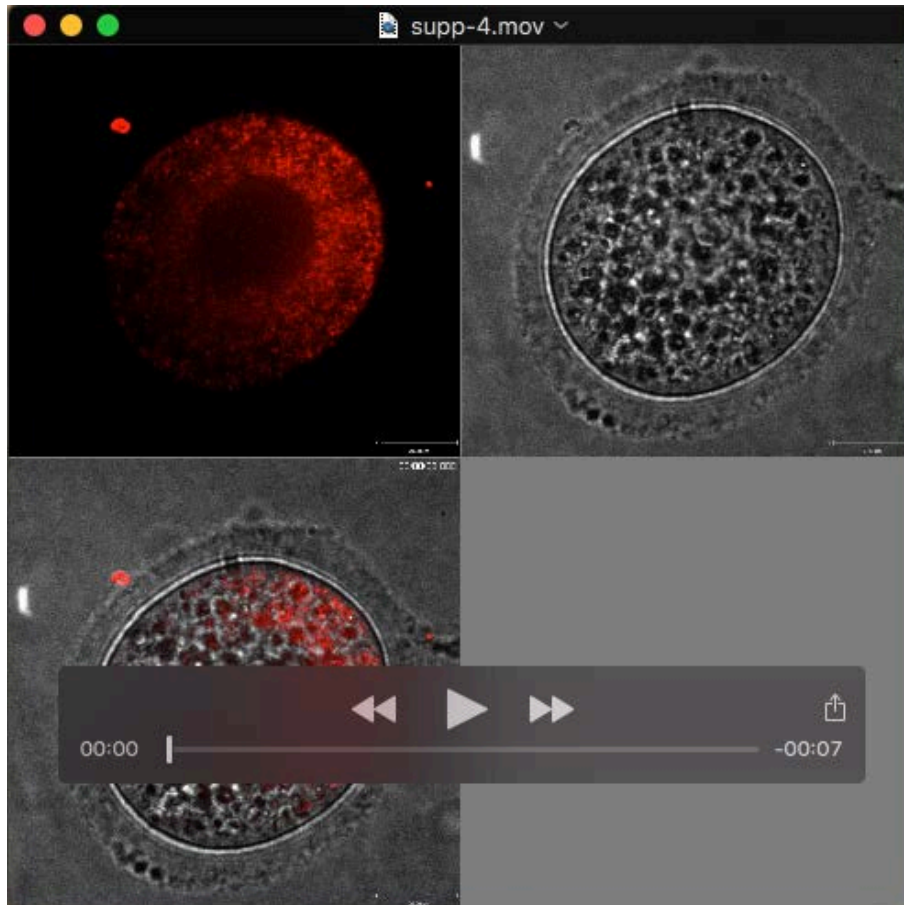

**Movie 4. Mitochondria dynamics in the oocytes from *Nlrp4f*<sup>-/-</sup> females during GV to MII maturation.** GV oocytes from *Nlrp4f*<sup>-/-</sup> females were labeled with MitoTracker for mitochondria and cultured to MII stage. Time-lapse images were captured every 30 mins with UltraVIEW-VoX. Related to Fig. 4D.
